# Supplementary material
Source: PubMed Central journal article supplement (PMC7178549)
Supplement: NIHMS1577580-supplement-Sup_0001.pdf [file NIHMS1577580-supplement-Sup_0001.pdf]

# Supplemental figures

**BB0326 is responsible for the formation of periplasmic flagellar collar and the assembly of the stator complex in *Borrelia burgdorferi***

Hui Xu<sup>1#</sup>, Jun He<sup>2#</sup>, Jun Liu<sup>2\*</sup>, Md A. Motaleb<sup>1\*</sup>

<sup>1</sup> Department of Microbiology and Immunology, Brody School of Medicine, East Carolina University, Greenville, North Carolina, USA

<sup>2</sup> Department of Microbial Pathogenesis, Microbial Sciences Institute, Yale School of Medicine, New Haven, CT, USA

#Hui Xu and Jun He contributed equally.

\*For correspondence: MD A. MOTALEB, E-mail: [motalebm@ecu.edu](mailto:motalebm@ecu.edu), or JUN LIU, E-mail: [jliu@yale.edu](mailto:jliu@yale.edu)

## Figure S1

|                            |            |            |            |            |            |             |            |            |
|----------------------------|------------|------------|------------|------------|------------|-------------|------------|------------|
| <b>1</b>                   | MPDVKIIQF  | KREILDNLSN | ERLSKESFGL | SMDVKLPEPG | ESIVPWIGED | LALDETDDDEL | DLNFMLDALE | NEDKLSYSDI |
| <b>81</b>                  | FNDNLPLSGS | NLRVDVDSEL | STLNNDFDVS | SSDSFENNID | KVLDDNSIDL | EIASKLDFDN  | LINSPELSSE | ELINNQGNNN |
| <b>161</b>                 | FFEANNDSSV | LGDSNFLQSN | EFNIDDAVNG | KNQTDEQSEM | FVGDSLNLSA | DEDDFENVID  | DFKFLEYDQN | ANFKRFEFKV |
| <b>241</b>                 | NYPLFLKHLN | SYPRNLRIAI | AEALTKENVS | RFKLEALIDL | VEKNKKRLKF | IAKFVGDIVG  | RSIKLPVIYF | KAEEFSKLQQ |
| <b>Transmembrane helix</b> |            |            |            |            |            |             |            |            |
| <b>321</b>                 | KLSYRVSRAL | LPLIKIASFF | VVLVLVSLYL | IVDVIFFYVA | SESKYKEGIE | SIYANKRDLA  | KSIFRDAYYI | RPDDKWFINY |
| <b>401</b>                 | AKAFEDVRDF | DSAEKEYEEL | FTIEPFSKNS | TNRRRKKFNK | EGYISYASMK | IGLGEHSEAN  | SILDEVISYD | LYDYDALVLK |
| <b>PG-binding loop</b>     |            |            |            |            |            |             |            |            |
| <b>481</b>                 | GDNYFKWAKT | NSNYKDSIN  | SYTVVLSKYG | QKKEILFKLF | NAYIEANLDT | ESDNVNNFIK  | SNEILDIDEV | VYTKYAKKLV |
| <b>561</b>                 | DKYISFVTYN | QRANNLAINL | NYLNGQTNLL | NKEFSDFKRN | DGRTIFKLDN | NVNMNSEIEY  | ILRKILNKNP | NYDKALFESG |
| <b>641</b>                 | RYSYYIGDFK | KAEVYLLKAL | NSFRHKNSIE | DAGDKILAYK | ILADIYEKTR | DSLRSNIIG   | LALSDYSFYK | KHNLIKGSKE |
| <b>TPR repeat 1</b>        |            |            |            |            |            |             |            |            |
| <b>721</b>                 | ISSIYEKQGD | ILRSLNDFKS | AISSYKLAIN | EGVDYPDVYY | KVGLLSYREN | NYDDALKYLF  | KVESMAGFSS | SNEVLNTIAL |
| <b>TPR repeat 2</b>        |            |            |            |            |            |             |            |            |
| <b>TPR repeat 3</b>        |            |            |            |            |            |             |            |            |
| <b>801</b>                 | TLYKIGDFLA | SRSYYLRVMQ | NLELEKANVL | NFNPKENDYH | KTLLLKEIET | YNNLGVVEVM  | ASFSSIRDTK | LFNSGVSNLS |
| <b>881</b>                 | ESAKIFDILN | RDEDMVKSVK | KDLASLNLRN | IFKNSFSKSN | VLFYENLSEK | L           |            |            |

**Figure S1. Amino acid sequence, membrane topology and the domain/motifs of BB0326 (931 aa., accession no. NP\_212460.1).** Transmembrane helix (aa 329-351) is predicted through TMHMM, potential peptidoglycan-binding site (aa 525-543) (see Fig. 1B ) and TPR motifs (repeat 1: aa 736-750, repeat 2: 755-785, repeat 3: 792-820) were determined by analyzing the sequence using NCBI BLASTP.

Figure S2

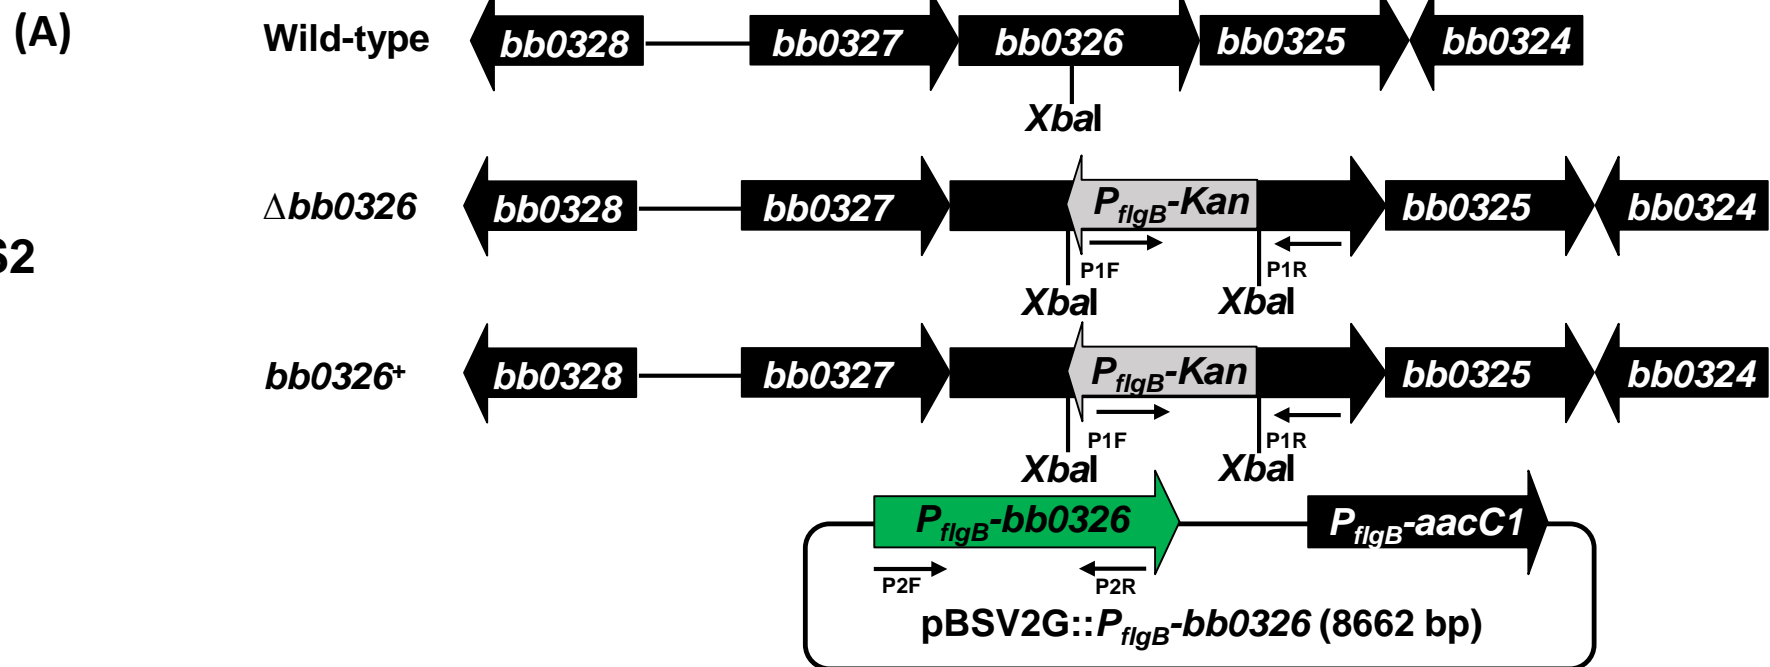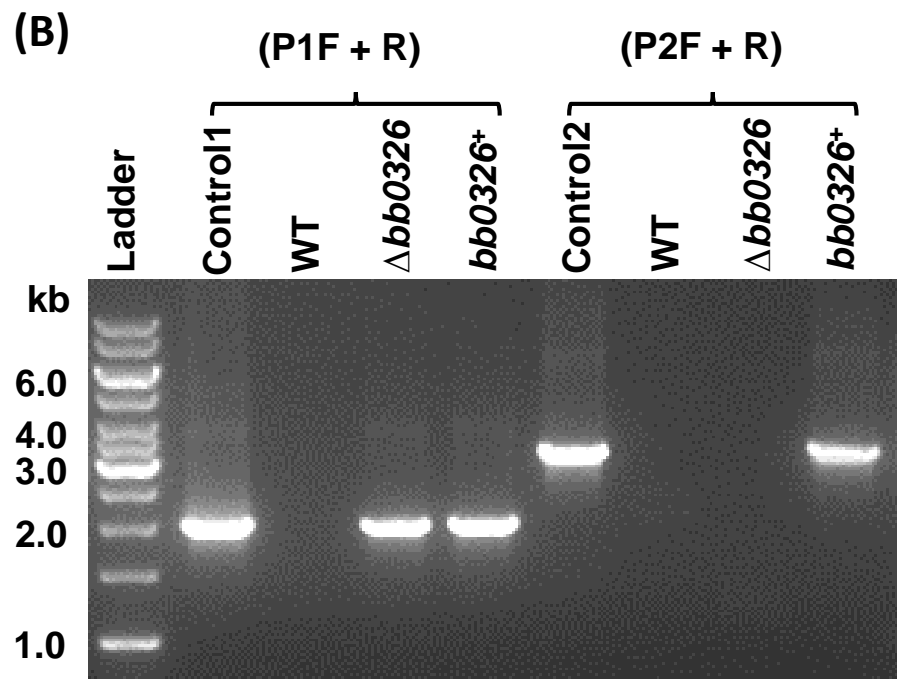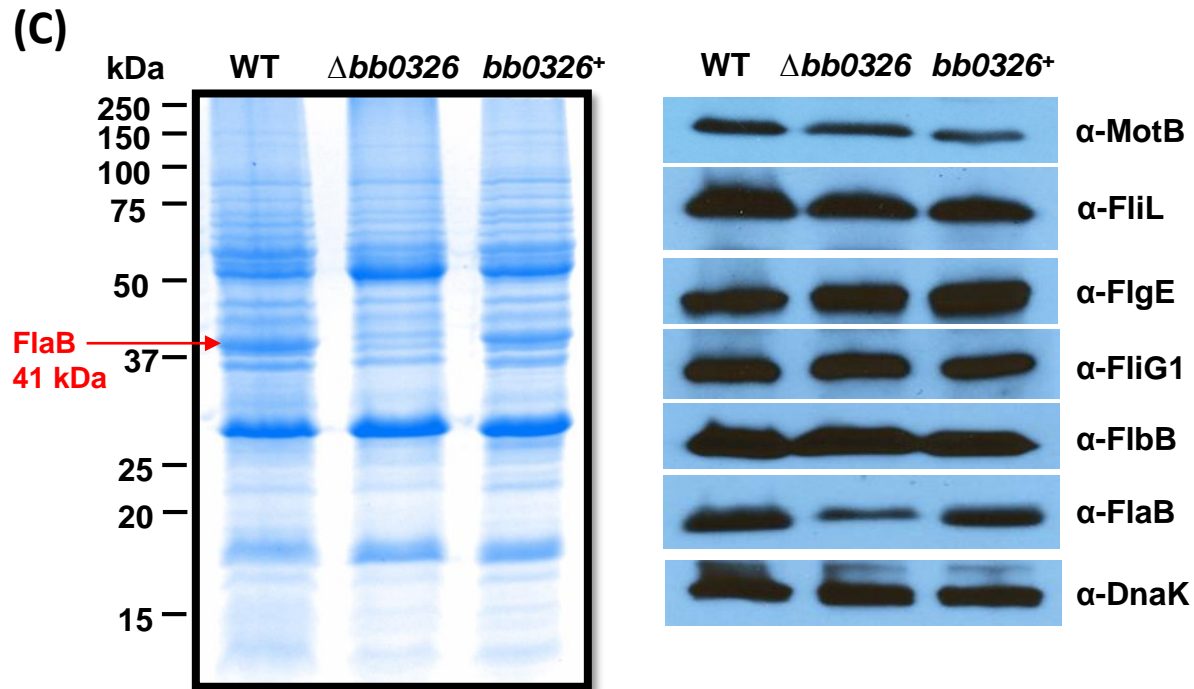

**Figure S2. Inactivation and complementation of *bb0326*.** (A) The *bb0326* gene is within an operon consisting of three genes (diagram is not to scale). The *bb0326* gene was inactivated by insertion of  $P_{flgB}$ -*Kan* cassette using allelic exchange mutagenesis in B31-A wild-type background. The *bb0326* mutant cells were complemented *in trans* using pBSV2G:: $P_{flgB}$ -*bb0326* (8662 bp). (B) Confirmation of inactivation and complementation of  $\Delta bb0326$  by PCR. (C) Effect of *bb0326* mutation on other flagellar protein syntheses were determined by Western blotting. Wild-type,  $\Delta bb0326$ , and *bb0326*<sup>+</sup> cell lysates (10  $\mu$ g in each lane) were subjected to SDS-PAGE followed by coomassie staining. 41 kDa FlaB protein band is indicated by a red arrow (left). A gel ran parallelly was transferred to a PVDF membrane for immunoblot analysis (right). Immunoblots were performed with *B. burgdorferi* MotB, FliL, FlgE, FliG1, FliB, FlaB-specific antibodies. DnaK was used as a loading control.

Figure S3

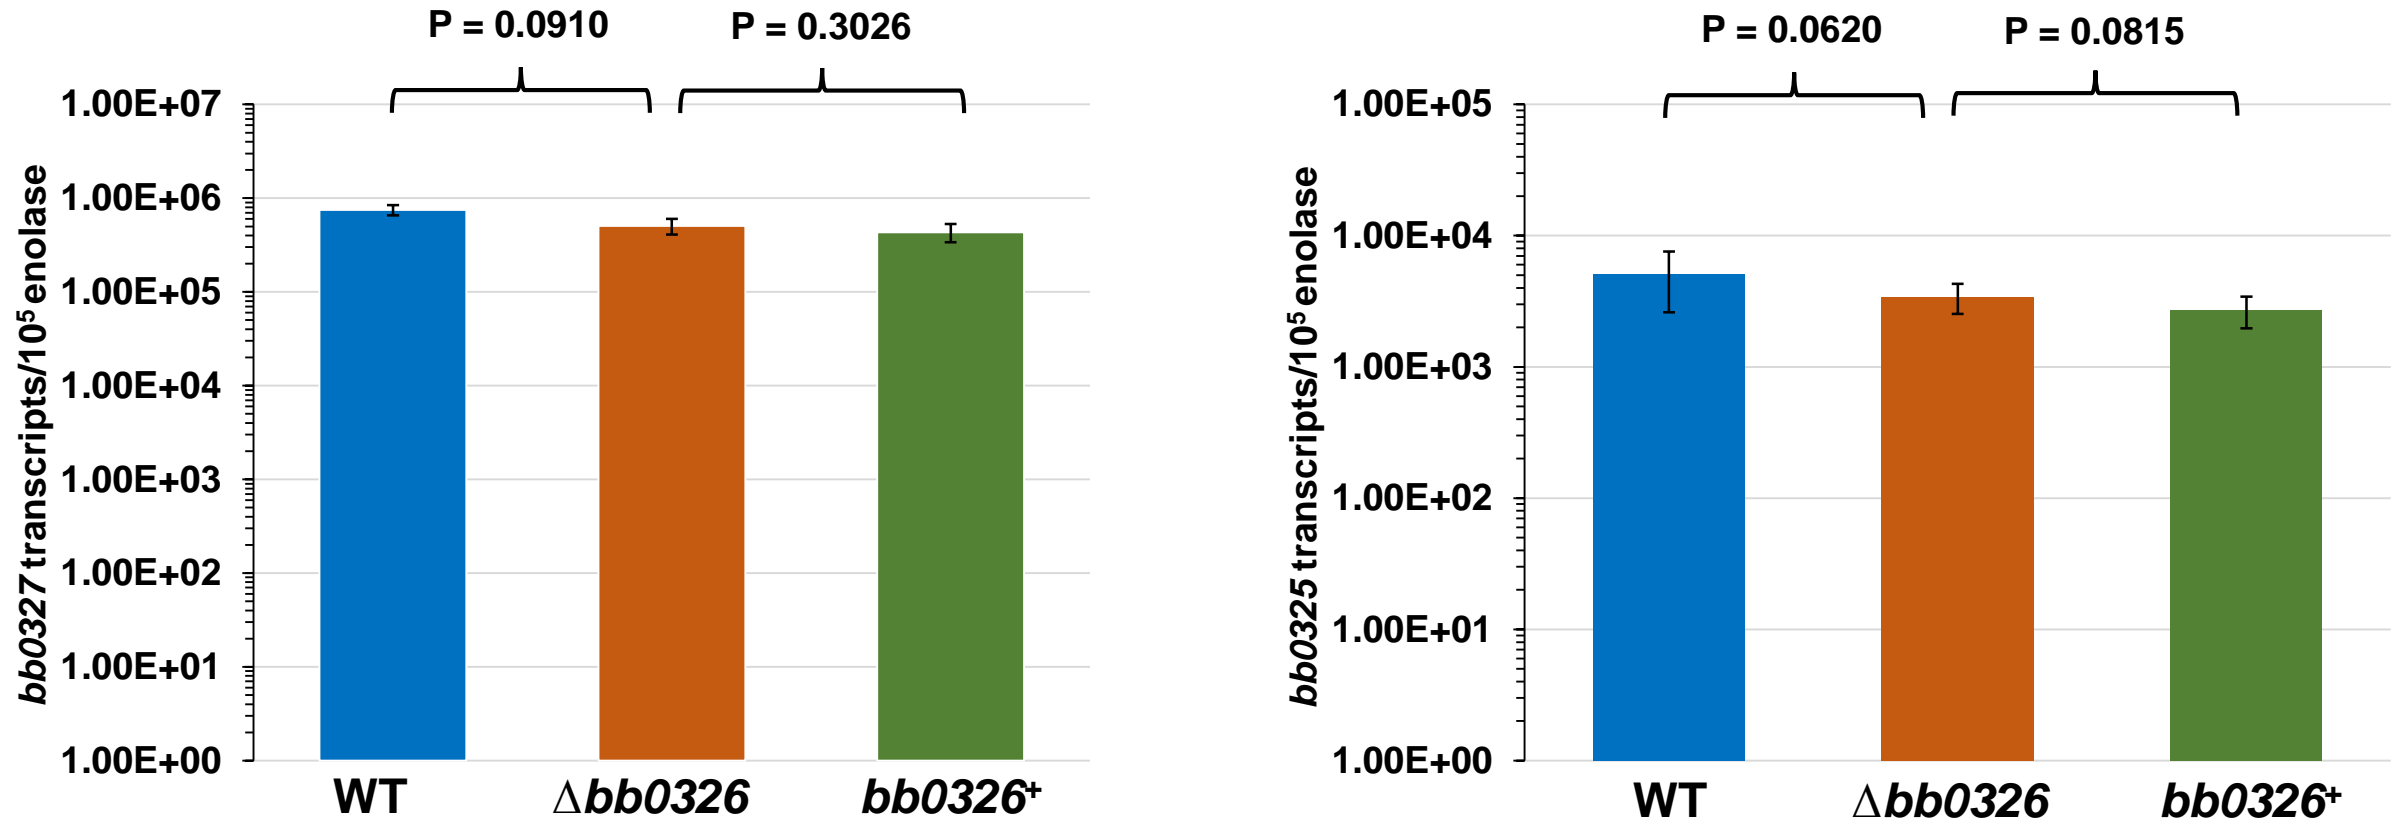

Figure S3. Expression of genes upstream and downstream of *bb0326* were not affected by the targeted mutagenesis of *bb0326*. Quantitative measurement of transcripts in the indicated spirochete clones by qRT-PCR. The relative transcript levels of *bb0327* (left), and *bb0325* (right) were determined in the wild-type,  $\Delta bb0326$  and *bb0326*<sup>+</sup> cells which were then compared with the expression of *B. burgdorferi enolase* gene. The bars represent mean  $\pm$  standard deviation of the mean from three independent samples. Statistical analysis was performed by using Student's *t*-test. P-values between samples are shown at the top. A P-value of  $<0.05$  was evaluated as significantly different.

**Figure S4**

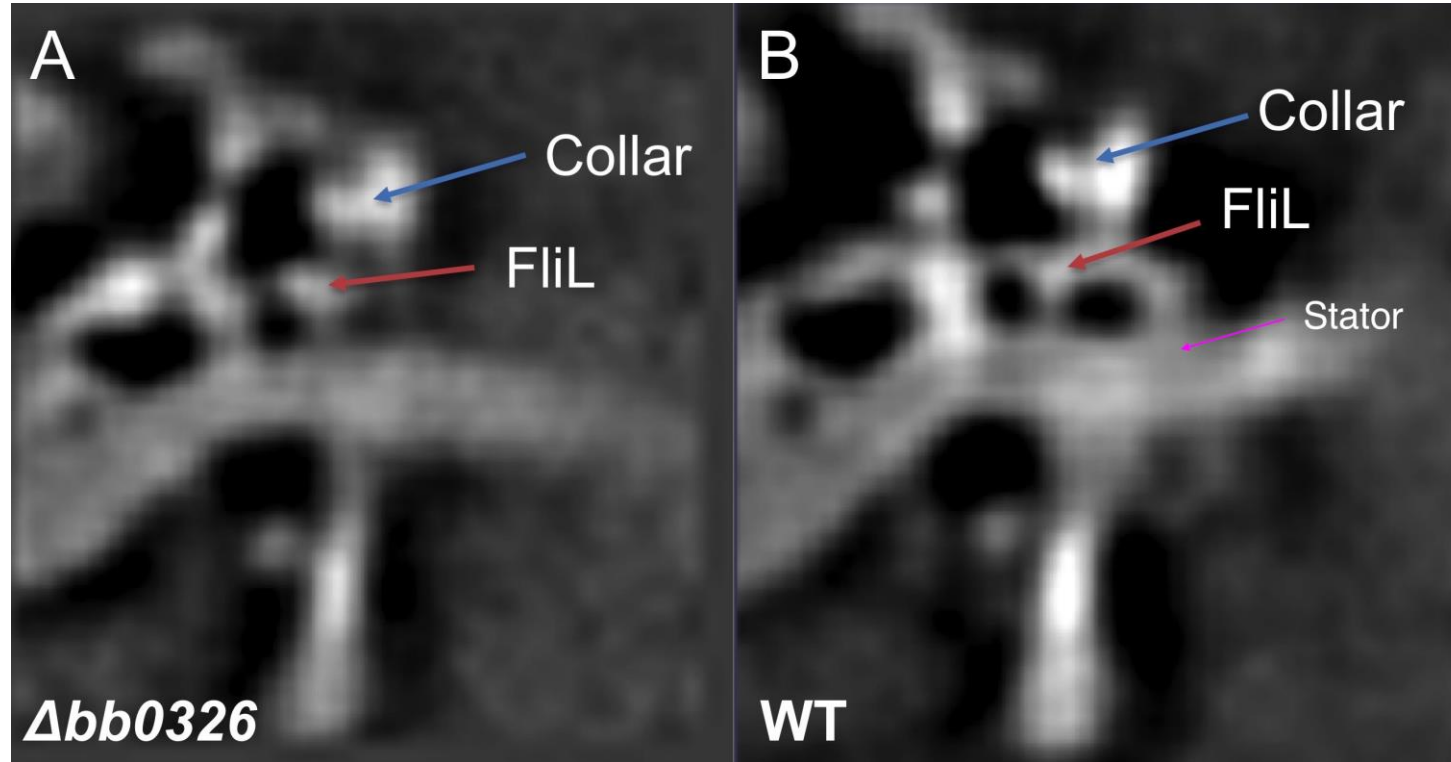

**Figure S4. FliL assembly is not affected in the  $\Delta bb0326/\Delta fliA$  mutant as determined by high-resolution cryo-ET. (A)** An average structure of the flagellar motor from the  $\Delta fliA$  mutant cells. **(B)** A similar average structure of the flagellar motor from the WT cells. Density around the FliL is shown to explicitly determine collar, FliL and stator structures.
